# Supplementary material for: Structure and reactivity with oxygen of Pr2NiO4+δ: an in situ synchrotron X-ray powder diffraction study
Source: Royal Society of Chemistry journal article supplement (doi:10.1039/c5dt03482e), 2016-01-01
Supplement: c5dt03482e1.pdf [file c5dt03482e1.pdf]

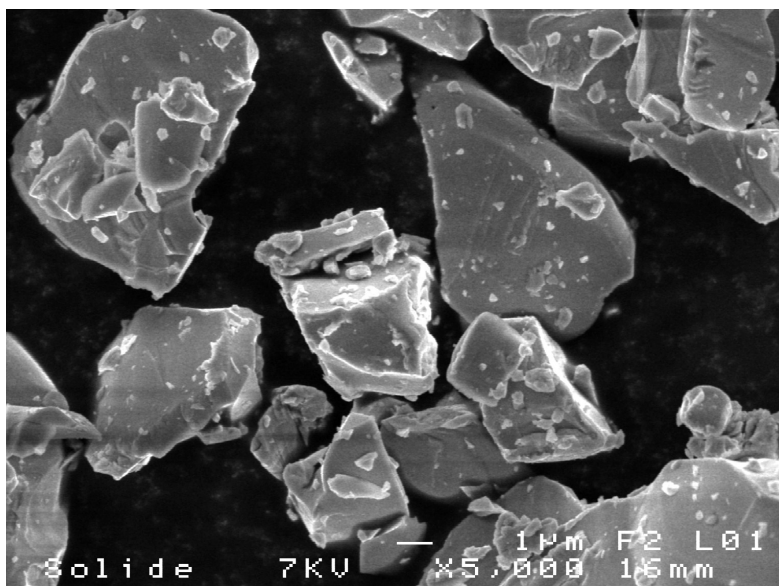

Figure S1. SEM picture of as prepared  $\text{Pr}_2\text{NiO}_{4.22}$ .

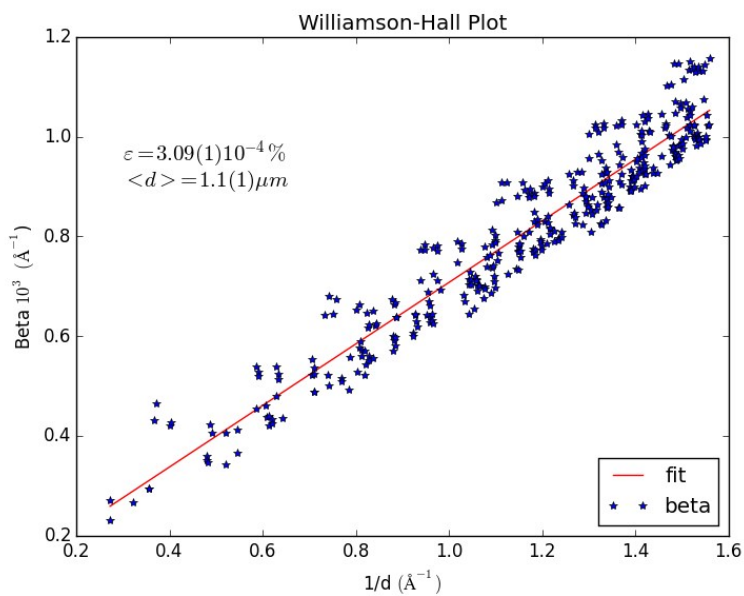

Figure S2. Williamson-Hall plot and estimation of size ( $\langle d \rangle$ ) and microstrains ( $\epsilon$ ) at RT.

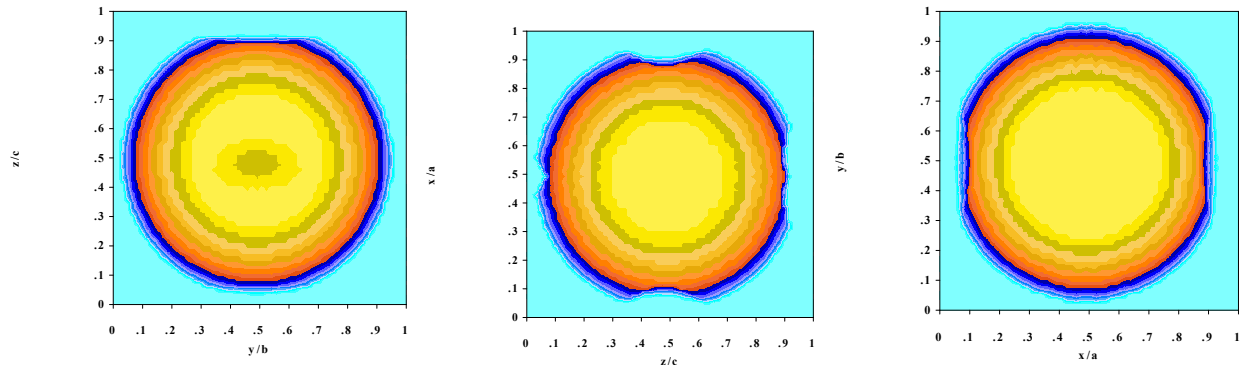

**Figure S3.** Projection along the three crystal axes of average particle size at RT using profile terms Y00, Y40, Y44+, Y44-. Average apparent particle size and standard deviation estimated by FullProf: 1.7 (1.0)  $\mu\text{m}$ . Average maximum strain and standard deviation estimated by FullProf:  $3.5(0.4) \times 10^{-4} \%$ .

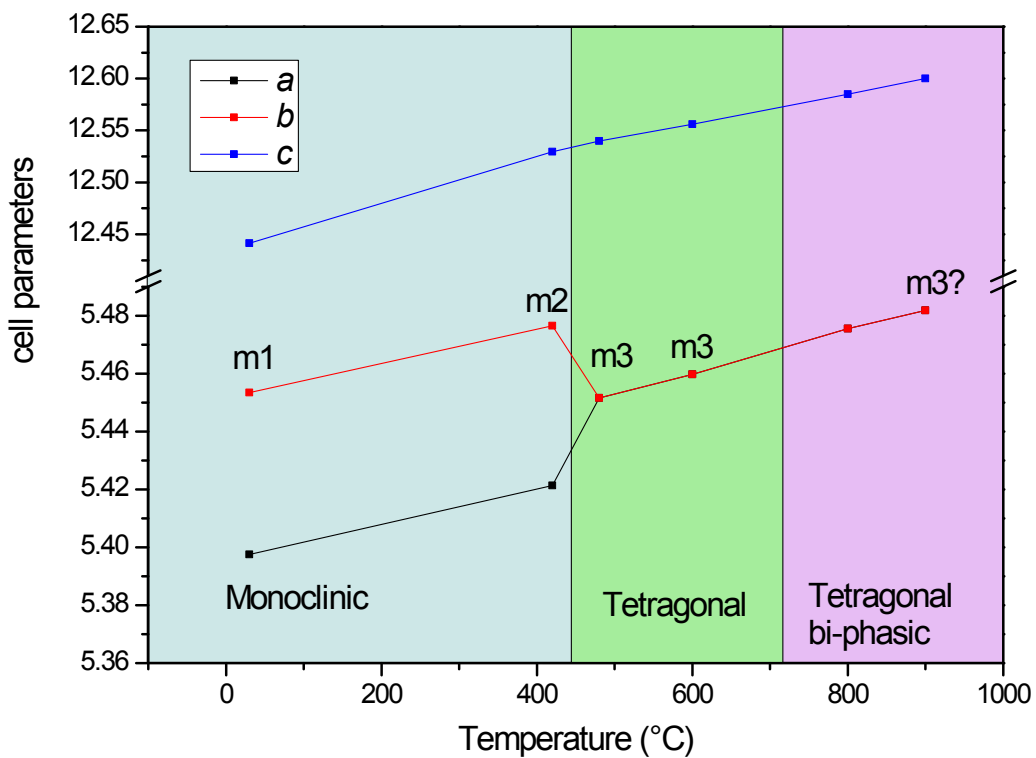

**Figure S4.** Tentative thermal phase diagram for  $\text{Pr}_2\text{NiO}_{4.22}$  under  $\text{O}_2$ . Modulation type is indicated as m1, m2, m3. For high temperature it is impossible to define the resemblance with lower temperature satellite schemes because of the coexistence of phases and the small intensity of satellite peaks.

| $T$ (°C) | $2\theta$ -range (°) |
|----------|----------------------|
| 25       | 0.002-46.998         |
| 420      | 0.002-46.998         |
| 480      | 0.002-46.998         |
| 600      | 0.002-46.998         |
| 800      | 0.002-46.998         |
| 900      | 0.002-46.998         |
| 950      | 0.002-46.998         |
| 700      | 0.002-46.998         |
| 480      | 0.002-46.998         |
| 420      | 0.002-46.998         |
| 50       | 0.002-46.998         |

| $T$ (°C)            | $2\theta$ -range (°) |
|---------------------|----------------------|
| 370-530 (each 10°C) | 6.000-16.998         |
| 420                 | 12.000-13.998        |
| 460                 | 14.070-13.998        |
| 510                 | 12.000-13.998        |
| 600                 | 6.000-16.998         |
| 650-660 (each 10°C) | 6.000-17.998         |
| 700                 | 6.000-17.998         |
| 720                 | 6.000-17.998         |
| 740                 | 6.000-17.998         |
| 870                 | 6.000-17.998         |

**Table S1:** Temperature of data collection on CRISTAL beam line under O<sub>2</sub> (1 bar, 100 ml/min:  $p_{\text{O}_2} = 1$  bar) and  $2\theta$ -range ( $\lambda = 0.5113$  Å).

| $T$ (°C) | $2\theta$ -range (°) |
|----------|----------------------|
| 24       | 0.002-46.998         |
| 50       | 0.002-46.998         |
| 300      | 0.002-46.998         |
| 480      | 0.002-46.998         |
| 600      | 0.002-46.998         |
| 800      | 0.002-46.998         |
| 900      | 0.002-46.998         |
| 700      | 0.002-46.998         |
| 480      | 0.002-46.998         |
| 300      | 0.002-46.998         |

**Table S2:** Temperature of data collection on CRISTAL beam line under Ar (1 bar, 100 ml/min:  $p_{O_2} = 10^{-3}$  bar) and  $2\theta$ -range ( $\lambda = 0.5113 \text{ \AA}$ ).

| Atom             | $x/a$ | $y/b$ | $z/c$      | $U_{aniso \text{ or } iso} (\text{\AA}^2)$                                                       | Occupancy |
|------------------|-------|-------|------------|--------------------------------------------------------------------------------------------------|-----------|
| Pr               | 0     | 0     | 0.35943(2) | $U_{11} = 0.02033(10)$ , $U_{22} = 0.0235(2)$<br>$U_{33} = 0.01526(10)$ , $U_{12} = -0.00082(4)$ | 1         |
| Ni               | 0     | 0     | 0          | $U_{11} = 0.0104(3)$ , $U_{22} = 0.01078(17)$<br>$U_{33} = 0.0267(4)$ , $U_{12} = 0.0012(3)$     | 1         |
| O <sub>ap</sub>  | 0     | 0     | 0.1747(2)  | $U_{11} = 0.064(3)$ , $U_{22} = 0.133(3)$<br>$U_{33} = 0.014(1)$ , $U_{12} = 0.043(4)$           | 1         |
| O <sub>eq1</sub> | 0.25  | 0.75  | 0          | 0.025(2)                                                                                         | 1         |
| O <sub>eq2</sub> | 0.25  | 0.25  | 0          | 0.029(2)                                                                                         | 1         |
| O <sub>int</sub> | 0.25  | 0.75  | 0.25       | 0.025(2)                                                                                         | 0.10      |

**Table S3.** Structural parameters of Pr<sub>2</sub>NiO<sub>4.20</sub> at 420°C (LTM phase) under O<sub>2</sub>. Space group:  $F112/m$ . Unit cell parameters:  $a = 5.42129(11)$ ,  $b = 5.47653(6)$ ,  $c = 12.52950(4) \text{ \AA}$ ;  $\gamma = 90.037(1)^\circ$ .  $R_{wp} = 6.91$ ,  $R_p = 4.98$ ,  $R_{Bragg} = 2.52$ ,  $R_F = 2.05 \%$  and  $S = 1.38$ . Interstitial oxygen occupancy fixed at the value obtained by TGA and  $U_{iso}(O_{int})$  constrained to the value of  $U_{iso}(O_{eq1})$ .

| Atom            | $x/a$ | $y/b$ | $z/c$      | $U_{aniso \text{ or } iso} (\text{\AA}^2)$                             | Occupancy |
|-----------------|-------|-------|------------|------------------------------------------------------------------------|-----------|
| Pr              | 0     | 0     | 0.35979(2) | $U_{11} = 0.02314(7)$ , $U_{22} = 0.02314(7)$<br>$U_{33} = 0.01471(8)$ | 1         |
| Ni              | 0     | 0     | 0          | $U_{11} = 0.0121(2)$ , $U_{22} = 0.0121(2)$<br>$U_{33} = 0.0256(3)$    | 1         |
| O <sub>ap</sub> | 0     | 0     | 0.1762(2)  | $U_{11} = 0.097(2)$ , $U_{22} = 0.097(2)$<br>$U_{33} = 0.008(1)$       | 1         |
| O <sub>eq</sub> | 0.25  | 0.75  | 0          | $U_{11} = 0.0126(8)$ , $U_{22} = 0.0126(8)$                            | 1         |

|                  |      |      |      |                     |      |
|------------------|------|------|------|---------------------|------|
|                  |      |      |      | $U_{33} = 0.052(2)$ |      |
| O <sub>int</sub> | 0.25 | 0.75 | 0.25 | 0.003(4)            | 0.09 |

**Table S4.** Structural parameters of Pr<sub>2</sub>NiO<sub>4.18</sub> at 480°C (HTT phase) under O<sub>2</sub>. Space group: *F4/mmm*. Unit cell parameters:  $a = 5.45162(1)$ ,  $c = 12.53970(2)$  Å.  $R_{wp} = 7.19$ ,  $R_p = 5.34$ ,  $R_{Bragg} = 2.99$ ,  $R_F = 2.11$  % and  $S = 1.30$ . Interstitial oxygen occupancy fixed at the value obtained by TGA.

| Atom             | $x/a$ | $y/b$ | $z/c$      | $U_{aniso\ or\ iso}$ (Å <sup>2</sup> )                                | Occupancy |
|------------------|-------|-------|------------|-----------------------------------------------------------------------|-----------|
| Pr               | 0     | 0     | 0.36000(2) | $U_{11} = 0.02514(8)$ , $U_{22} = 0.02514(8)$<br>$U_{33} = 0.0164(1)$ | 1         |
| Ni               | 0     | 0     | 0          | $U_{11} = 0.0129(2)$ , $U_{22} = 0.0129(2)$<br>$U_{33} = 0.0302(4)$   | 1         |
| O <sub>ap</sub>  | 0     | 0     | 0.1761(2)  | $U_{11} = 0.088(2)$ , $U_{22} = 0.088(2)$<br>$U_{33} = 0.012(1)$      | 1         |
| O <sub>eq</sub>  | 0.25  | 0.75  | 0          | $U_{11} = 0.0135(9)$ , $U_{22} = 0.0135(9)$<br>$U_{33} = 0.061(2)$    | 1         |
| O <sub>int</sub> | 0.25  | 0.75  | 0.25       | 0.010(6)                                                              | 0.08      |

**Table S5.** Structural parameters of Pr<sub>2</sub>NiO<sub>4.16</sub> at 600°C (HTT phase) under O<sub>2</sub>. Space group: *F4/mmm*. Unit cell parameters:  $a = 5.45976(1)$ ,  $c = 12.55600(3)$  Å.  $R_{wp} = 7.47$ ,  $R_p = 5.70$ ,  $R_{Bragg} = 3.07$ ,  $R_F = 3.00$  % and  $S = 1.17$ . Interstitial oxygen occupancy fixed at the value obtained by TGA.

|       |         | a(Å)      | b(Å)      | c(Å)       |
|-------|---------|-----------|-----------|------------|
| 800°C | Phase 1 | 5.460(3)  | 5.460(3)  | 12.554(7)  |
|       | Phase 2 | 5.465(3)  | 5.465(3)  | 12.559(7)  |
| 900°C | Phase 1 | 5.479(3)  | 5.479(3)  | 12.595(8)  |
|       | Phase 2 | 5.484(3)  | 5.484(3)  | 12.604(8)  |
| 950°C | Phase 1 | 5.4819(6) | 5.4819(6) | 12.6000(6) |
|       | Phase 2 | 5.4873(6) | 5.4873(6) | 12.6094(9) |

**Table S6.** Structural parameters of Pr<sub>2</sub>NiO<sub>4.16</sub> in the biphasic region (2 HTT phase) from 800 °C to 950 °C under O<sub>2</sub>. Space group: *F4/mmm*.
